Anesthesiology  
1998; 89:401-10  
© 1998 American Society of Anesthesiologists, Inc.  
Lippincott-Raven Publishers

## Differential Effect of Halothane and Forskolin on Platelet Cytosolic $\text{Ca}^{2+}$ Mobilization and Aggregation

François Corbin, M.Sc.,\* Gilbert Blaise, M.D.,† Rémy Sauvé, Ph.D.‡

**Background:** Previous works have suggested that the impairment of platelet aggregation by halothane was partly related to a stimulation of cyclic adenosine monophosphate (cAMP) production, to an inhibitory effect on  $\text{Ca}^{2+}$  signaling, or both. Intracellular  $\text{Ca}^{2+}$  measurements therefore were undertaken, first to determine the critical steps in the platelet  $\text{Ca}^{2+}$  signaling cascade most likely to be affected by halothane or by an increase in cAMP production, and second to establish if the effect of halothane involves aggregation-related biochemical pathways triggered by an increase in internal  $\text{Ca}^{2+}$ .

**Methods:** Human washed platelets were treated with halothane or forskolin for 5 min before application of either platelet-activating factor, thrombin, U46619, or thapsigargin. The cytosolic  $\text{Ca}^{2+}$  concentration ( $[\text{Ca}^{2+}]_i$ ) was measured with the fluorescent  $\text{Ca}^{2+}$  indicator fura-2. Nephelometric measurements were also performed to assay the aggregation process.

**Results:** Our results indicate that pretreating platelets with halothane leads to a partial impairment of the  $[\text{Ca}^{2+}]_i$  increase induced either by U46619, thrombin, or platelet-activating factor, but this had no significant effect on the  $[\text{Ca}^{2+}]_i$  response triggered by thapsigargin. In addition, our results show that halothane inhibits platelet aggregation triggered by U46619, but not by thapsigargin. Conversely, forskolin completely inhibited the  $[\text{Ca}^{2+}]_i$  response to U46619 and thapsigargin and prevented platelet aggregation induced by both agonists.

**Conclusions:** These results suggest that halothane and cAMP exert their effects on platelet aggregation and  $\text{Ca}^{2+}$  signaling through different mechanisms, and that halothane cannot impair platelet aggregation independently of phospholipase C

stimulation. (Key words: Bleeding; phospholipase C; second messenger; thrombus; time.)

AMONG volatile anesthetics, halothane is unique in its ability to alter platelet function at clinically relevant concentrations.<sup>1</sup> In fact, halothane increases bleeding time *in vivo*<sup>2</sup> and impairs platelet aggregation *in vitro*.<sup>3,4</sup> More recently, it was reported that halothane protects against thrombus formation in stenosed coronary arteries in the dog.<sup>5</sup> However, the cellular mechanism underlying the action of halothane on platelet function still remains poorly circumscribed.

Platelet aggregation is a complex phenomenon that likely involves several intracellular biochemical pathways.<sup>6</sup> There is increasing evidence that internal  $\text{Ca}^{2+}$  stores play a central role in the response of platelets to activating agents.<sup>7</sup> It is thus possible that part of the observed effect of halothane on platelet aggregation results from an impaired  $\text{Ca}^{2+}$  response. In fact, halothane is already known to affect  $\text{Ca}^{2+}$  signaling in many cell types,<sup>8-10</sup> including human platelets.<sup>11</sup> There are, however, several possible ways by which halothane can interfere with  $\text{Ca}^{2+}$  signaling and platelet aggregation. For instance, halothane could affect the production of second messengers linked to  $\text{Ca}^{2+}$  mobilization, or inhibit directly the internal  $\text{Ca}^{2+}$  release plus agonist-induced  $\text{Ca}^{2+}$  influx initiated after platelet stimulation. In the latter case, the halothane effect would not require phospholipase C activation. In addition, halothane might affect the biochemical pathways that are triggered by internal  $\text{Ca}^{2+}$  and that lead to platelet aggregation. Under these conditions, halothane would impair platelet aggregation independently of the mechanisms responsible for the increase in cytosolic  $\text{Ca}^{2+}$ .

Several studies have also provided evidence that cyclic AMP (cAMP) is involved in the action of halothane on many cell types, including platelets.<sup>12,13</sup> In these preparations, halothane was shown to promote cAMP formation by stimulating adenylate cyclase without af-

\* Graduate Student, Department of Physiology.

† Professor, Department of Anesthesia.

‡ Professor, Department of Physiology.

Received from Département de Physiologie, Groupe de Recherche en Transport Membranaire, Université de Montréal, Montréal, Québec, Canada. Submitted for publication May 2, 1997. Accepted for publication March 25, 1998. Supported by grants from the Heart and Stroke Foundation of Canada (to Dr. Sauvé) and from the Medical Research Council of Canada (to Dr. Blaise). Presented in part at the 12th International Congress of Pharmacology, Montréal, June 1994.

Address reprint requests to Dr. Sauvé: Département de Physiologie, Université de Montréal, C.P. 6128, Succ. A, Montréal (Québec), Canada, H3C 3J7. Address electronic mail to: sauvere@alize.ere.umontreal.ca



fecting phosphodiesterases.<sup>11</sup> It is known that cAMP is one of the most potent platelet function inhibitors, and investigators have proposed that the inhibitory action of halothane on platelet aggregation resulted from an increased level of cAMP.<sup>13</sup> Because cAMP impairs  $\text{Ca}^{2+}$  mobilization in platelets,<sup>14</sup> an effect of halothane on aggregation may also arise from an enhanced cAMP production, which would in turn affect internal  $\text{Ca}^{2+}$  mobilization.

Thus the purpose of this study was to determine more precisely the mechanism by which halothane affects  $\text{Ca}^{2+}$  signaling and platelet aggregation. Our results indicate first that halothane and cAMP exert their inhibitory effect through distinct mechanisms, and second that the action of halothane in these cells requires phospholipase C stimulation.

## Materials and Methods

### Solutions and Drugs

The acid-citrate dextrose anticoagulant was composed of 85 mM sodium citrate, 78 mM citric acid, and 111 mM dextrose. The control solution was composed of 10 mM HEPES (pH 7.4), 145 mM NaCl, 5 mM KCl, 1 mM  $\text{MgCl}_2$ , and 10 mM dextrose. Fura-2-AM, BAPTA (1,2-bis(2-aminophenoxy)ethane  $\text{N,N,N',N'}$ -tetraacetic acid), acetylsalicylic acid, and digitonin were purchased from Sigma Chemical Company (St. Louis, MO); U46619 was from Pharmacia and Upjohn (Kalamazoo, MI); thrombin (human plasma), forskolin, and platelet activating factor C-16 (1-O-palmityl-2-acetyl-sn-glycero-3-phosphocholine) were obtained from Calbiochem (San Diego, CA). Stock solutions of 24 mM halothane (Ayerst, Montréal, Québec, Canada) were prepared by vigorous stirring of halothane dissolved in control solutions for 2 h.

### Platelet Preparation

Fura-2-loaded platelets were prepared according to the method of Sage *et al.*,<sup>15</sup> with minor modifications. Blood from healthy nonmedicated volunteers was drawn in plastic tubes containing 15% vol/vol acid-citrate dextrose anticoagulant. Blood was centrifuged at 350g for 10 min, and the resulting platelet-rich plasma was treated with 100  $\mu\text{M}$  aspirin to ensure that the observed agonist-evoked effects did not result from the secondary formation of prostaglandins and thromboxanes. No phosphodiesterase inhibitors were used. Platelets in platelet-rich plasma were loaded with the fluo-

rescent probe fura-2-AM (4  $\mu\text{M}$ ) for 40 min at room temperature. They were sedimented by centrifugation at 437.5g for 15 min and resuspended in the control solution to achieve an approximate concentration of  $1.2 \times 10^6$  platelets per milliliter.

### Experimental Procedure

Washed platelets (1.4 ml) were introduced into a 1.8-ml gas-tight silicone-coated glass bottle that serves as a "gas-tight spectrofluorimeter cuvet."  $\text{CaCl}_2$  was added to a final concentration of 1 mM 5 min before fura-2 measurements. After the addition of  $\text{Ca}^{2+}$ , 100  $\mu\text{l}$  of the 24 mM halothane stock solution were injected into the cuvet using a gas-tight syringe, for a final concentration of 1.6 mM. This concentration of halothane corresponds to a gaseous partial pressure of 5% at 37°C, but to 3% in the current case because the experiments were done at 22°C.<sup>16</sup> The effective halothane concentration was tested in experiments in which the halothane content of control solutions was measured by gas chromatography, as previously described.<sup>17</sup> A similar procedure was used in experiments in which platelets were pretreated with forskolin (0.1 to 10  $\mu\text{M}$ ). Platelets were then stimulated with either 1  $\mu\text{M}$  U46619, 10 nM platelet-activating factor, 1 U/ml thrombin, or 1  $\mu\text{M}$  thapsigargin. In some experiments, 10 mM of the  $\text{Ca}^{2+}$  chelating agent BAPTA was added 50 s before the addition of the platelet stimulator to elicit a response in the absence of external  $\text{Ca}^{2+}$ .

### Fluorometric Measurements

Fluorometric measurements were performed using a dual-excitation spectrofluorometer (Spex Fluorolog II, Spex Industries, Edison, NJ). The excitation wavelengths were set at 340 nm and 380 nm, and emission was monitored at 505 nm. The cytosolic  $\text{Ca}^{2+}$  concentration ( $[\text{Ca}^{2+}]_i$ ) was calculated from the ratio of the fluorescence measured at 340 nm and 380 nm.<sup>18</sup> The ratios,  $R_{\min}$  and  $R_{\max}$ , were obtained by measuring the fluorescence in 5 mM EGTA plus digitonin (50  $\mu\text{M}$ ) at pH 9.0 in the absence and the presence of 10 mM  $\text{CaCl}_2$ , respectively.

### Qualitative Aggregation Measurements

For the aggregation measurements, washed platelets were prepared as described before and the same protocols were applied. Nephelometric measurements were used to assay the aggregation, with the increase in light transmission proportional to the extent of the aggregation. All experiments were done at room temperature.



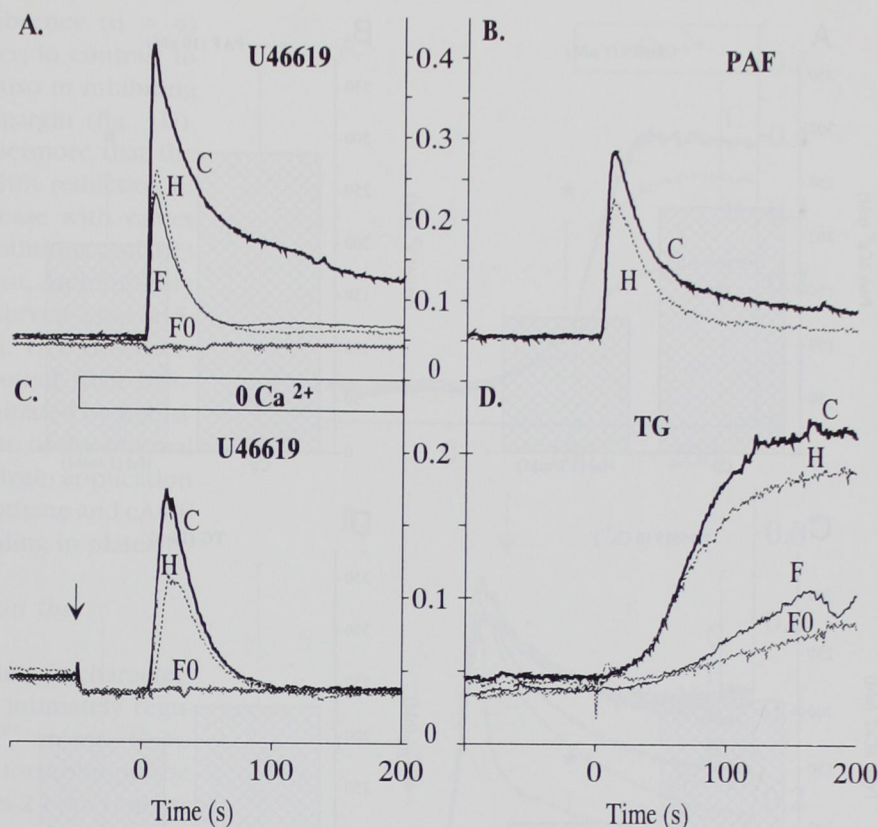

Fig. 1. Examples of  $[\text{Ca}^{2+}]_i$  measurements on fura-2-loaded platelets. (A) Platelets were bathed for 5 min in solutions containing either 1.6 mM halothane (H) or 0.1  $\mu\text{M}$  (F) forskolin to 1  $\mu\text{M}$  (F0) forskolin before the addition of 1  $\mu\text{M}$  U46619. (B) Effect of a 5-min pretreatment with 1.6 mM halothane (H) on the  $\text{Ca}^{2+}$  response in platelets stimulated by 10 nM platelet-activating factor (PAF). (C) Platelet  $\text{Ca}^{2+}$  response in zero-external  $\text{Ca}^{2+}$  conditions. Platelets were treated for 5 min with either 1.6 mM halothane (H) or 1  $\mu\text{M}$  forskolin (F0) before the addition of 1  $\mu\text{M}$  U46619. The  $\text{Ca}^{2+}$  chelator BAPTA (2 mM) was added 50 s before U46619 (arrow). (D) Differential effect of 0.1  $\mu\text{M}$  (F) forskolin to 1  $\mu\text{M}$  forskolin (F0) and halothane (H) pretreatment (5 min) on cells stimulated with the sarcoplasmic-endoplasmic reticulum  $\text{Ca}^{2+}$  ATPase inhibitor thapsigargin (TG; 1  $\mu\text{M}$ ). The experiments were done in the presence of 1 mM external  $\text{Ca}^{2+}$ . Control curves are labeled as C. The cytosolic  $\text{Ca}^{2+}$  concentration is expressed as micromolar.

### Statistical Analysis

Each set of experiments was repeated at least three times, and the results are presented as mean values  $\pm$  SD. Statistical significance was assessed by Student's *t* test. The significance level was set at  $P < 0.05$ .

## Results

### Effect of Halothane on $\text{Ca}^{2+}$ Signaling

The effect of halothane on basal  $[\text{Ca}^{2+}]_i$  was assayed by adding 1.6 mM halothane to resting platelet suspensions. In 75% of the experiments performed (32 of 42), a small transient  $[\text{Ca}^{2+}]_i$  increase of  $17 \pm 5$  nM was detected (data not shown). This halothane-evoked  $\text{Ca}^{2+}$  increase was observed in the presence and in the absence of external  $\text{Ca}^{2+}$ , suggesting that the observed  $\text{Ca}^{2+}$  increase was related to a mobilization of  $\text{Ca}^{2+}$  from intracellular stores.

Figure 1 shows examples of fura-2 recordings obtained from experiments aimed at investigating the effect of halothane on the  $\text{Ca}^{2+}$  response induced by vari-

ous platelet activators. Figure 2 summarizes the results of these experiments. In conditions in which platelets were exposed for 5 min to 1.6 mM halothane, there was a significant reduction of the initial U46619-evoked  $[\text{Ca}^{2+}]_i$  increase from  $227 \pm 115$  nM to  $124 \pm 89$  nM ( $n = 10$ ; fig. 2A). A significant decrease of the initial  $[\text{Ca}^{2+}]_i$  peak from  $286 \pm 80$  nM to  $196 \pm 67$  nM ( $n = 6$ ) was also observed after halothane treatment, when platelets were stimulated with 10 nM platelet-activating factor (fig. 2B). Similar results were obtained with thrombin (1 U/ml), with a reduction of the initial  $\text{Ca}^{2+}$  increase from  $252 \pm 128$  to  $149 \pm 42$  nM ( $n = 4$ ), respectively (data not shown).

The agonist-evoked  $\text{Ca}^{2+}$  response in platelets is a biphasic process characterized by a release of  $\text{Ca}^{2+}$  from internal stores coupled to a  $\text{Ca}^{2+}$  influx from the external medium. To determine if halothane could selectively inhibit the release of  $\text{Ca}^{2+}$  from internal pools, platelets were stimulated in the absence of external  $\text{Ca}^{2+}$ . In these experiments, BAPTA, a  $\text{Ca}^{2+}$ -chelator, was added 50 s before exposure to U46619, as shown in figure 1C. Under these conditions, halothane caused a significant



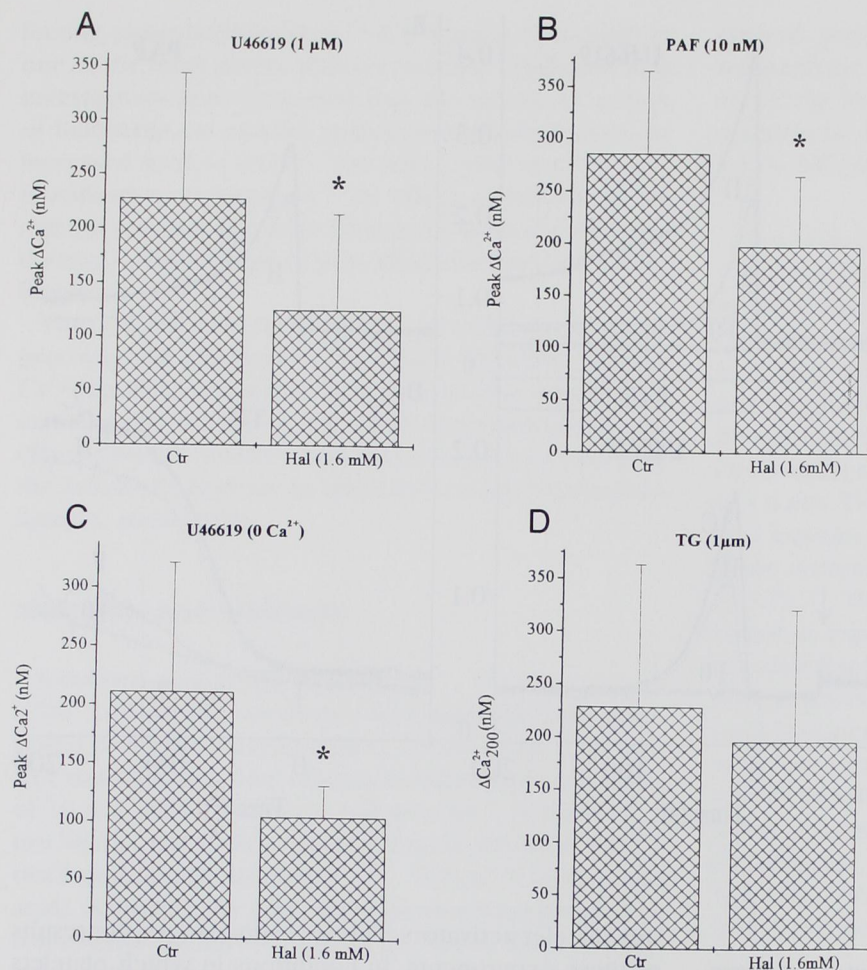

**Fig. 2.** The effect of halothane on the  $\text{Ca}^{2+}$  response of platelets to different stimulating agents. The effect of halothane on the amplitude of the peak  $\text{Ca}^{2+}$  increase initiated by U46619 (1  $\mu\text{M}$ ; A and C) or platelet-activating factor (PAF; 10 nM; B), or the  $\text{Ca}^{2+}$  increase at 200 s triggered by thapsigargin (TG; 1  $\mu\text{M}$ ; D). A significant effect ( $P < 0.05$ ) compared with control (Ctr) was observed in U46619 and platelet-activating factor-stimulated cells, but halothane did not affect the  $\text{Ca}^{2+}$  response when thapsigargin (TG) was used as stimulating agent. \* $P < 0.05$ . The analysis was based on  $n = 10$  in A and  $n = 6$  in B, C, and D.

decrease of the initial  $\text{Ca}^{2+}$  peak induced by U46619 from  $210 \pm 110$  nM to  $104 \pm 25$  nM ( $n = 7$ ; fig. 2C), indicating an action of halothane on the mechanisms underlying the release of  $\text{Ca}^{2+}$  from internal pools. Similar results were obtained with platelet-activating factor and thrombin (data not shown).

To determine if the observed action of halothane on  $\text{Ca}^{2+}$  signaling requires the production of second messengers related to the phosphoinositide pathway, halothane experiments were performed in which platelets were stimulated with the sarcoplasmic-endoplasmic reticulum  $\text{Ca}^{2+}$  ATPase inhibitor, thapsigargin. Thapsigargin selectively blocks the internal  $\text{Ca}^{2+}$  sequestration process, leading to an uncompensated  $\text{Ca}^{2+}$  leak from internal stores. A mobilization of internal  $\text{Ca}^{2+}$  is generated under these conditions without producing the second messenger myo inositol-1,4,5 trisphosphate ( $\text{InsP}_3$ ). In addition, this progressive and constant emptying of internal  $\text{Ca}^{2+}$  pools has been shown to trigger a  $\text{Ca}^{2+}$  entry

from the external medium, called capacitative  $\text{Ca}^{2+}$  influx.<sup>7,19,20</sup> The results in figures 1D and 2D show that halothane, at a supraclinical concentration of 1.6 mM, failed to significantly affect the  $[\text{Ca}^{2+}]_i$  mobilization induced by thapsigargin, with a change from  $227 \pm 135$  nM to  $195 \pm 124$  nM ( $n = 7$ ) of the  $\text{Ca}^{2+}$  level measured 200 s after thapsigargin application. These results suggest that stimulation of phospholipase C is essential for halothane to inhibit the mobilization of  $\text{Ca}^{2+}$  from internal  $\text{Ca}^{2+}$  pools and the related capacitative  $\text{Ca}^{2+}$  influx.

#### Effect of Forskolin on $\text{Ca}^{2+}$ Signaling

Because halothane increased cAMP production in platelets, experiments were done to compare the action of forskolin and halothane on the  $\text{Ca}^{2+}$  response induced by U46619 or thapsigargin. Figures 1A and 1C show that a 5-min treatment with 1  $\mu\text{M}$  forskolin completely abolished the  $\text{Ca}^{2+}$  increase triggered by U46619



in the presence ( $n = 4$ ) or in the absence ( $n = 4$ ) of external  $\text{Ca}^{2+}$ , respectively. However, in contrast to halothane,  $1 \mu\text{M}$  forskolin succeeded also in inhibiting the  $\text{Ca}^{2+}$  response induced by thapsigargin (fig. 1D). The results in figure 1A indicate furthermore that the addition of  $0.1 \mu\text{M}$  forskolin caused a 50% reduction of the mean U46619-evoked  $[\text{Ca}^{2+}]_i$  increase with values of  $250 \pm 35 \text{ nM}$  ( $n = 3$ ) in control conditions and  $123 \pm 20 \text{ nM}$  ( $n = 3$ ) after forskolin treatment. An inhibitory effect of equivalent potency was observed after a 5-min exposure to  $1.6 \text{ mM}$  halothane (fig. 1A). However, forskolin at  $0.1 \mu\text{M}$  appeared more potent than halothane in inhibiting the  $\text{Ca}^{2+}$  response initiated by thapsigargin, with a  $42 \pm 7\%$  ( $n = 3$ ) reduction of the internal  $\text{Ca}^{2+}$  level measured 200 s after thapsigargin application (fig. 1D). These results suggest that halothane and cAMP operate in different ways on  $\text{Ca}^{2+}$  signaling in platelets.

#### Effect of Halothane and Forskolin on the Capacitative $\text{Ca}^{2+}$ Influx

The capacitative  $\text{Ca}^{2+}$  entry in platelets is characterized by an external  $\text{Ca}^{2+}$  influx that is intimately regulated by the emptying of internal  $\text{Ca}^{2+}$  stores.<sup>7,19</sup> To investigate the effect of halothane and forskolin on the capacitative  $\text{Ca}^{2+}$  entry in platelets, fura-2 experiments were performed in which thapsigargin was used to generate a release of  $\text{Ca}^{2+}$  from internal pools in the absence of  $\text{InsP}_3$  production. In a first series of experiments, platelets were first treated for 5 min with either  $1.6 \text{ mM}$  halothane or forskolin ( $0.1$  to  $1 \mu\text{M}$ ) before the addition of thapsigargin ( $1 \mu\text{M}$ ) in the absence of external  $\text{Ca}^{2+}$ . The  $\text{Ca}^{2+}$  influx was initiated by the subsequent addition ( $100 \text{ s}$  after thapsigargin) of  $1 \text{ mM}$   $\text{CaCl}_2$  to the external medium (fig. 3A). Pretreatment with  $0.1 \mu\text{M}$  forskolin decreased by  $50 \pm 7\%$  ( $n = 4$ ) the internal  $\text{Ca}^{2+}$  level measured  $100 \text{ s}$  after the addition of external  $\text{Ca}^{2+}$ , whereas total inhibition of the  $\text{Ca}^{2+}$  response was observed in platelets exposed to  $1 \mu\text{M}$  forskolin (data not shown). In contrast, under the same experimental conditions, halothane had a nonsignificant effect on the thapsigargin-evoked capacitative  $\text{Ca}^{2+}$  influx, with a reduction of the related  $\text{Ca}^{2+}$  increase of  $10 \pm 6\%$  ( $n = 4$ ).

In a second series of experiments, halothane and forskolin were added at the peak of the  $\text{Ca}^{2+}$  response after thapsigargin stimulation. The importance of the  $\text{Ca}^{2+}$  influx to the thapsigargin-induced  $\text{Ca}^{2+}$  increase was estimated in this case by chelating the external  $\text{Ca}^{2+}$  with BAPTA  $50 \text{ s}$  after thapsigargin exposure. Figure 3B shows that the addition of BAPTA resulted in a slow

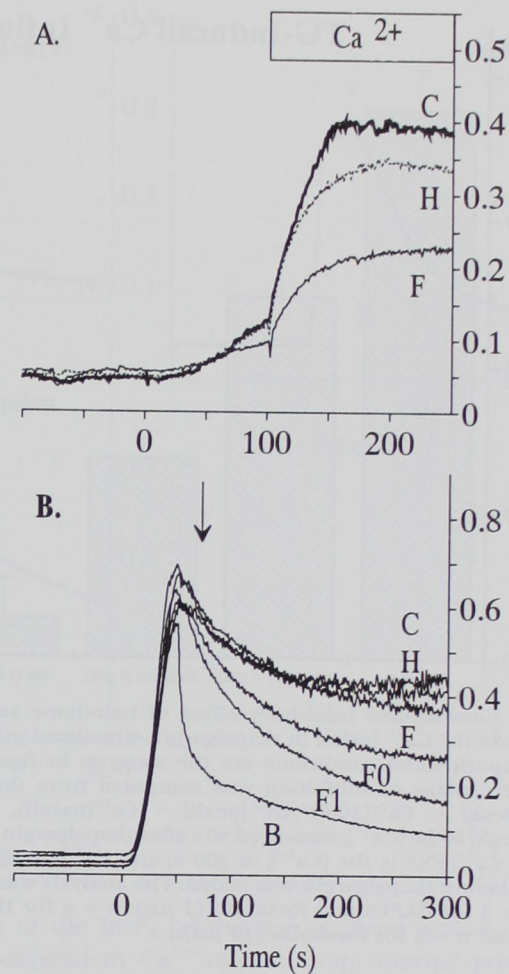

Fig. 3. Effect of halothane on the  $\text{Ca}^{2+}$  influx initiated by thapsigargin stimulation. (A)  $\text{Ca}^{2+}$  influx generated by  $\text{Ca}^{2+}$  readmission after withdrawal of  $\text{Ca}^{2+}$  from the external medium. Platelets were treated 5 min with either  $1.6 \text{ mM}$  halothane (H) or  $0.1 \mu\text{M}$  forskolin (F) before fura-2 measurements in zero-external  $\text{Ca}^{2+}$  conditions. Thapsigargin (TG,  $1 \mu\text{M}$ ) was added  $100 \text{ s}$  before the readmission of  $\text{Ca}^{2+}$  in the external medium. Halothane had a minimal effect on the  $\text{Ca}^{2+}$  entry caused by  $\text{Ca}^{2+}$  readmission. (B) Acute addition of halothane or forskolin to thapsigargin-stimulated platelets. BAPTA (B), halothane (H), and forskolin ( $0.1 \mu\text{M}$  [F],  $1 \mu\text{M}$  [F0],  $10 \mu\text{M}$  [F1]) were added  $50 \text{ s}$  after thapsigargin (TG) stimulation. In the total absence of  $\text{Ca}^{2+}$  influx in BAPTA conditions, the internal  $\text{Ca}^{2+}$  level decayed to a low steady-state value. In contrast, the addition of halothane had no effect on the  $\text{Ca}^{2+}$  level in thapsigargin (TG)-stimulated platelets. A dose-response inhibition of the  $\text{Ca}^{2+}$  entry was observed when platelets were exposed to forskolin at concentrations ranging from  $0.1$  to  $10 \mu\text{M}$ . Control curves are labeled as C.

decay of the internal  $\text{Ca}^{2+}$  level to a lower steady-state value, indicating an absence of  $\text{Ca}^{2+}$  entry in external  $\text{Ca}^{2+}$  free conditions. Similarly, a dose-dependent de-



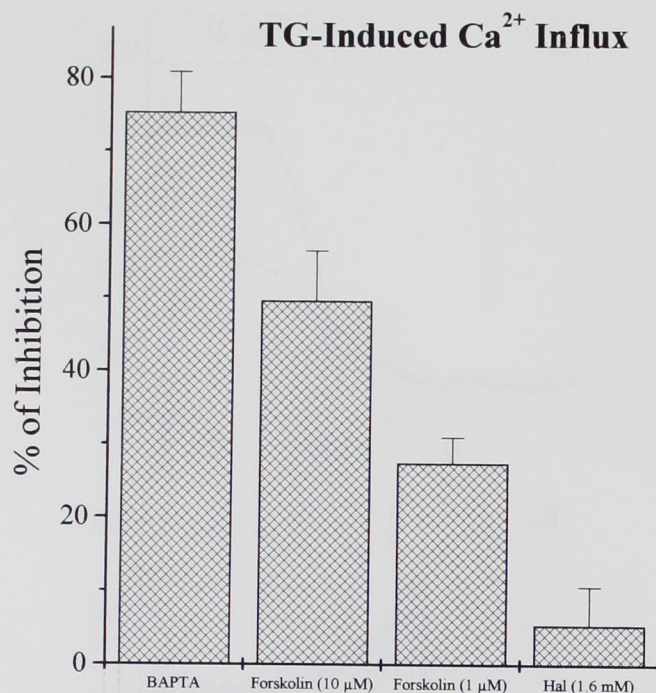

Fig. 4. Comparative inhibitory effect of halothane and forskolin on the  $\text{Ca}^{2+}$  influx in thapsigargin-stimulated platelets. The experimental conditions are the same as in figure 3B. The percentage of inhibition was computed from the ratio  $(\text{Ca}^{2+}[\text{peak}] - \text{Ca}^{2+}[\text{300}]) / (\text{Ca}^{2+}[\text{peak}] - \text{Ca}^{2+}[\text{basal}])$ , where  $\text{Ca}^{2+}[\text{peak}]$  is the  $[\text{Ca}^{2+}]_i$  measured 50 s after thapsigargin stimulation,  $\text{Ca}^{2+}[\text{300}]$  is the  $[\text{Ca}^{2+}]_i$  at 300 s, and  $\text{Ca}^{2+}[\text{basal}]$  is the  $[\text{Ca}^{2+}]_i$  before thapsigargin was added. The analysis was based on  $n = 3$  for BAPTA and forskolin ( $1 \mu\text{M}$ );  $n = 4$  for Hal ( $1.6 \text{ mM}$ ); and  $n = 5$  for forskolin ( $10 \mu\text{M}$ ).

crease of the fura-2 signal was observed after the addition of forskolin at concentrations ranging from  $0.1$  to  $10 \mu\text{M}$  (fig. 3B). Figure 4 summarizes the results of these experiments. The presence of BAPTA caused a  $75 \pm 5\%$  ( $n = 4$ ) inhibition of the  $\text{Ca}^{2+}$  influx, compared with  $49 \pm 7\%$  ( $n = 4$ ) and  $27 \pm 4\%$  ( $n = 4$ ) with forskolin at  $10 \mu\text{M}$  and  $1 \mu\text{M}$ , respectively. As observed previously, halothane had no effect ( $5 \pm 5\%$ ,  $n = 4$ ) on thapsigargin-induced  $\text{Ca}^{2+}$  influx. These results provide additional evidence for a differential effect between halothane and forskolin on  $\text{Ca}^{2+}$  signaling machinery in platelets.

#### Acute Effect of Halothane on $\text{Ca}^{2+}$ Signaling

The inhibition of the initial agonist-induced  $\text{Ca}^{2+}$  increase by halothane illustrated in figures 1A to 1C was measured after a 5-min pretreatment with halothane. Experiments were also performed in which halothane was added 30 s after the mobilization of  $\text{Ca}^{2+}$  in re-

sponse to several platelet activators. This protocol allows the internal stores to deplete rapidly and transitionally, with a maximal and sustained contribution of the  $\text{Ca}^{2+}$  influx process. The results presented in figure 5A to 5C indicate that the acute addition of halothane to U46619-, platelet-activating factor-, and thrombin-stimulated cells initiated a small increase in the rate at which the fura-2 signal decayed to a lower steady state value. These observations suggest that halothane can also rapidly affect the sustained agonist-mediated  $\text{Ca}^{2+}$  entry.

#### Effect of Halothane on Platelet Aggregation

Figures 6A and 6B show the effect of halothane and forskolin on platelet aggregation caused by U46619 and thapsigargin, respectively. The results indicate that halothane and forskolin acted differently, depending on the platelet activator used. A high concentration of forskolin ( $1 \mu\text{M}$ ) completely inhibited platelet aggregation induced by either U46619 ( $n = 3$ ) or thapsigargin ( $n = 4$ ). In contrast,  $1.6 \text{ mM}$  halothane impaired the aggregation triggered by U46619 ( $n = 3$ ) but failed to affect the thapsigargin-mediated aggregation process ( $n = 4$ ).

#### Discussion

This study investigated the effect of halothane on platelet  $\text{Ca}^{2+}$  mobilization and aggregation. Our results essentially indicate that halothane inhibits the aggregation and initial  $\text{Ca}^{2+}$  release in platelets stimulated with agonists linked to the phosphatidylinositol pathway, but affect minimally the  $\text{Ca}^{2+}$  response and the aggregation process induced by thapsigargin.

#### Effect of Halothane on Agonist-evoked $\text{Ca}^{2+}$ Responses

The results presented in figures 1A, 1B, 2A, and 2B indicate that halothane inhibits the internal  $\text{Ca}^{2+}$  increase induced by U46619 and platelet-activating factor. These results support the original observations of Kohro and Yamakage,<sup>11</sup> who reported a dose-dependent inhibition of the  $\text{Ca}^{2+}$  release induced by thrombin in human platelets. In their study, halothane was effective at clinically relevant concentrations ( $<1 \text{ mM}$ ), and complete inhibition of the  $\text{Ca}^{2+}$  increase triggered by thrombin was observed at  $2 \text{ mM}$  halothane, with half inhibition measured at  $1 \text{ mM}$ . There was no effect of isoflurane. In the current work, a near 50% inhibition was obtained at  $1.6 \text{ mM}$  halothane, depending on the agonist



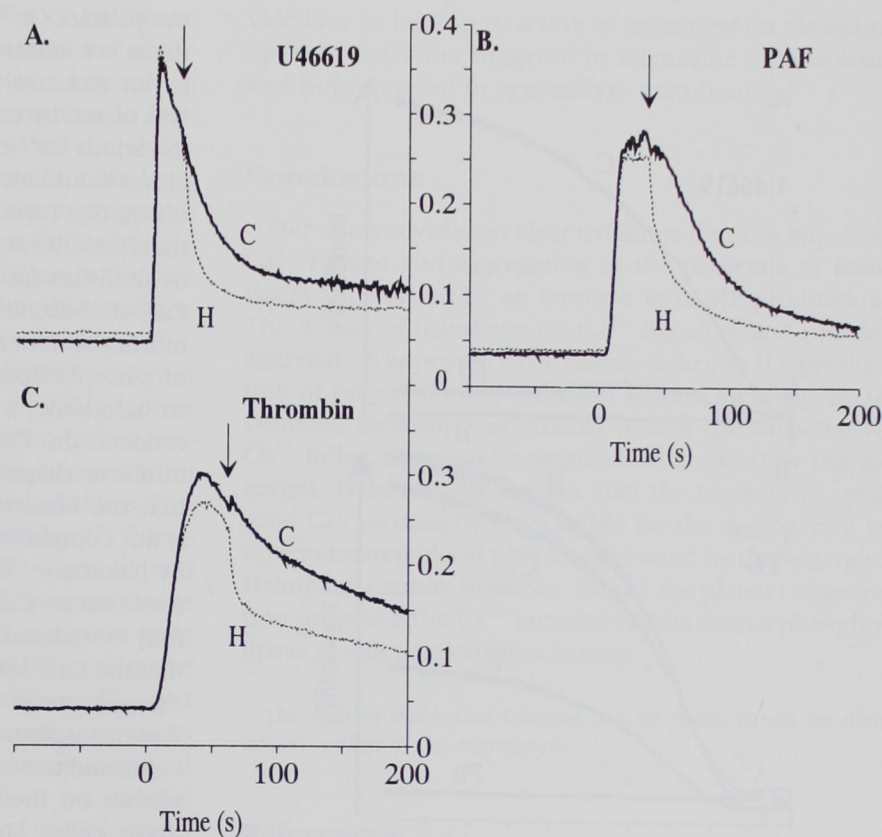

**Fig. 5.** The acute effect of halothane on the stimulated  $\text{Ca}^{2+}$  level induced by U46619, platelet-activating factor, and thrombin. Experiments were done in the presence of 1 mM external  $\text{CaCl}_2$ . Halothane (H, 1.6 mM) was added 30 s (arrow) after platelet stimulation with either 1  $\mu\text{M}$  U46619 (A) or 10 nM platelet-activating factor (PAF) (B) and 60 s after stimulation with 1 U/ml thrombin (C). This protocol allows the fast depletion of internal  $\text{Ca}^{2+}$  stores, keeping an important contribution of the capacitative  $\text{Ca}^{2+}$  influx. Control curves are labeled as C. Cytosolic  $\text{Ca}^{2+}$  concentration is expressed as micromolar.

used as a stimulating agent. A higher halothane concentration in our case may be explained in part by differences in experimental conditions, such as the temperature (room temperature in the current study compared with 37°C in the work of Kohro and Yamakage<sup>11</sup>), because the same concentration of 1.6 mM halothane corresponds to a gaseous partial pressure of 5% at 37°C and 3% at 22°C.<sup>16</sup> Given the negative results obtained by Kohro and Yamakage,<sup>11</sup> we did not investigate isoflurane further in the current study.

The action of halothane may involve various specific mechanisms, including inhibition of the internal  $\text{Ca}^{2+}$  release from internal stores,<sup>9,21</sup> decrease of the  $\text{Ca}^{2+}$  influx,<sup>10</sup> or impairment of the  $\text{Ca}^{2+}$  extrusion processes.<sup>22</sup> In platelets, the  $\text{Ca}^{2+}$  response to U46619 stimulation results from a fast release of  $\text{Ca}^{2+}$  from internal stores and a sustained  $\text{Ca}^{2+}$  influx from the external medium.<sup>7,23</sup> The results in figures 1B and 2B provide clear evidence that halothane interferes strongly with the initial  $\text{Ca}^{2+}$  release process as already reported in some cell preparations.<sup>9,21</sup> This impaired  $\text{Ca}^{2+}$  release may result from several mechanisms, including an inhi-

bition of the  $\text{InsP}_3$  production, a direct action on the  $\text{InsP}_3$ -dependent  $\text{Ca}^{2+}$  release from internal pools, or both. In this regard, evidence has already been provided for a reduced  $\text{InsP}_3$  production in thrombin-stimulated human platelets exposed to halothane (2 mM).<sup>11</sup> In addition, the absence of a halothane-dependent inhibition of the  $\text{Ca}^{2+}$  increase initiated by thapsigargin argues for an effect of halothane on the production of second messengers linked to phospholipase C stimulation.

Further, when halothane was added after U46619 or thrombin or platelet-activating factor, there was a clear increase in the rate at which the  $[\text{Ca}^{2+}]_i$  decayed to a lower steady state value (figs. 5A–C). Because  $\text{Ca}^{2+}$  influx is responsible for the sustained  $[\text{Ca}^{2+}]_i$  increase observed under these conditions, halothane thus appears to inhibit  $\text{Ca}^{2+}$  influx, as reported in endothelial cells.<sup>10</sup> However, halothane had no effect on the capacitative  $\text{Ca}^{2+}$  influx induced by thapsigargin (figs. 3A and 3B) suggesting first that halothane does not significantly modify the  $\text{Ca}^{2+}$  extrusion process, and second that part of the  $\text{Ca}^{2+}$  influx in U46619-stimulated cells is mediated by a second messenger-dependent  $\text{Ca}^{2+}$  entry process



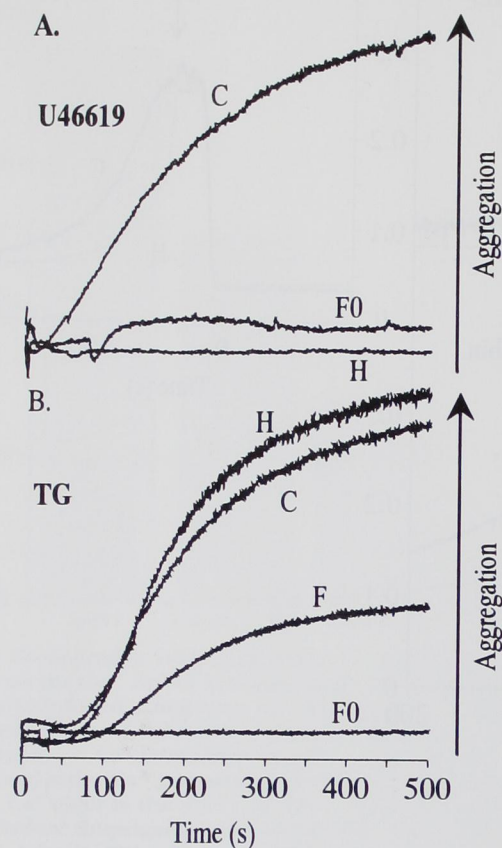

Fig. 6. The effect of halothane and forskolin on the aggregation induced by thapsigargin and U46619. Traces represent nephelometric measurements in which the transmittance is proportional to the extent of the aggregation. Platelets were treated for 5 min with either 1.6 mM halothane (H) or forskolin (0.1  $\mu$ M [F] and 1  $\mu$ M [F0]) before the addition at  $t = 0$  s of 1  $\mu$ M U46619 (A) or 1  $\mu$ M thapsigargin (TG) (B).

distinct from the capacitative  $\text{Ca}^{2+}$  influx and that would be halothane sensitive. Kinetic experiments have already shown that  $\text{Ca}^{2+}$  influx precedes  $\text{Ca}^{2+}$  release,<sup>24</sup> suggesting that the capacitative  $\text{Ca}^{2+}$  influx is not exclusively responsible for the overall  $\text{Ca}^{2+}$  influx observed in U46619-stimulated platelets. Therefore, a direct correlation seems to exist between the production of second messengers, which participate in  $\text{Ca}^{2+}$  mobilization processes in platelets, and the ability of halothane to interfere with the  $\text{Ca}^{2+}$  signaling machinery.

#### *The Effect of Forskolin on $\text{Ca}^{2+}$ Signaling*

Previous studies have shown that halothane increases cAMP production in platelets.<sup>13</sup> Because cAMP alters

the platelet  $\text{Ca}^{2+}$  signaling process,<sup>6</sup> the effects of halothane we observed could have been indirectly caused by an increase in cAMP production. This mechanism was tested by comparing the  $\text{Ca}^{2+}$  response of platelets to various  $\text{Ca}^{2+}$ -mobilizing agonists, after treatment with either halothane or forskolin, an agent that directly stimulates the formation of cAMP. Our results confirmed that forskolin at concentrations of 0.1 to 1  $\mu$ M attenuates or abolishes (or both), in a dose-dependent manner, the  $\text{Ca}^{2+}$  mobilization initiated by U46619 (fig. 1A). Furthermore, the action of cAMP appeared to be independent of phospholipase C stimulation, because, in contrast to halothane, a pretreatment with forskolin markedly reduced the  $\text{Ca}^{2+}$  increase initiated by the  $\text{Ca}^{2+}$  pump inhibitor thapsigargin (fig. 1D). These results suggest that the observed effect of halothane on  $\text{Ca}^{2+}$  release is not compatible with a stimulation of cAMP formation by halothane. The mechanism underlying the action of forskolin on  $\text{Ca}^{2+}$  signaling in platelets is not, however, fully elucidated. A report by Koike *et al.*<sup>25</sup> has indicated that the  $\text{Ca}^{2+}$  influx induced in human platelets by thapsigargin could be partly suppressed by pretreatment with phosphatase inhibitors, such as okadaic acid, calyculin, and tautomycin, suggesting an effect of phosphorylation on the  $\text{Ca}^{2+}$  influx evoked by thapsigargin in these cells. These observations point to a different mechanism of action between forskolin and halothane on  $\text{Ca}^{2+}$  response.

#### *Effect of Halothane and Forskolin on Platelet Aggregation*

Because cAMP is recognized as a potent platelet aggregation inhibitor,<sup>7,14</sup> experiments were done to test the hypothesis that the effect of halothane on platelet aggregation<sup>2-4</sup> was mediated, at least in part, by cAMP. The results in figures 6A and B do not, however, support this hypothesis. For instance, 1.6 mM halothane completely inhibited the aggregation induced by U46619, an effect that could be mimicked by 1  $\mu$ M forskolin (fig. 6A). The results in figure 6B indicate, however, that, in contrast to forskolin at 1  $\mu$ M, halothane did not inhibit platelet aggregation initiated with thapsigargin, even when it was used at a supraclinical concentration of 1.6 mM. A model in which the action of halothane would be mediated exclusively by an increased cAMP production should have yielded identical results in both cases. Thus our observations correspond with the findings reported by Kohro and Yamakage<sup>11</sup> and do not support a cAMP-based effect of halothane on platelet aggregation (fig. 6A).



The mechanism underlying the action of halothane remains, however, ill defined. It is clear from our observations that cytosolic  $\text{Ca}^{2+}$  seems to play a key role in the effect of halothane on platelet aggregation. In fact, we observed a strong correlation between the ability of halothane to affect the  $\text{Ca}^{2+}$  response in stimulated platelets and its potency to impair platelet aggregation. For instance, halothane had no effect on  $\text{Ca}^{2+}$  mobilization and aggregation triggered by thapsigargin. In contrast, halothane significantly inhibited the platelet aggregation process in response to U46619 stimulation (fig. 6A), in agreement with the potent inhibitory action of halothane on the  $\text{Ca}^{2+}$  response induced by this agonist (figs. 1A and 1C). A similar relation between  $\text{Ca}^{2+}$  signaling and platelet aggregation can also be inferred from the results obtained from forskolin-treated platelets. Forskolin impaired the increase in intracellular  $\text{Ca}^{2+}$  triggered by both thapsigargin and U46619 (figs. 1A and 1D), supporting the platelet aggregation measurements presented in figures 6A and 6B. It is also apparent from these observations that the mechanisms underlying the action of halothane and forskolin on  $\text{Ca}^{2+}$  signaling and aggregation differ. In the case of halothane, our results point to a requirement for a phospholipase C-related second messenger formation for an effect on internal  $\text{Ca}^{2+}$  and platelet aggregation, as reported by Kohro and Yamakage.<sup>11</sup> Such a requirement was not observed in thapsigargin-stimulated platelets exposed to forskolin. In addition, our results showed that halothane does not affect the events leading to platelet aggregation downstream from the release of  $\text{Ca}^{2+}$  from internal pools and the initiation of a  $\text{Ca}^{2+}$  influx. Even when halothane was used at high concentrations (1.6 mM) and caused an inhibition of the  $\text{Ca}^{2+}$  response of platelets to  $\text{Ca}^{2+}$  mobilizing agonists, there was no effect of halothane on the thapsigargin-induced platelet aggregation, despite an increase of  $\text{Ca}^{2+}$  in this case. Thus halothane is likely to affect events before the  $\text{Ca}^{2+}$  release process. For instance, halothane may alter phospholipase C activation and decrease the production of both  $\text{InsP}_3$  and diacylglycerol. This would in turn lead to a reduced  $\text{InsP}_3$ -mediated  $\text{Ca}^{2+}$  release while providing a mechanism whereby the effect of halothane on aggregation is mediated by a decreased protein kinase C (PKC) activity. In fact, PKC activation by phorbol esters has been shown to induce platelet aggregation through a  $\text{Ca}^{2+}$ -independent process.<sup>26,27</sup> It is thus possible that part of the action of halothane on platelet aggregation may be the result of an inhibition of the PKC-activation pathway. In support of this model, evidence has been pro-

vided for an inhibitory action of halothane on phospholipase C activation triggered by adenosine diphosphate and isoproterenol in erythrocyte membranes.<sup>28</sup>

## Conclusions

Our study reveals no clear evidence that the impaired  $\text{Ca}^{2+}$  release and aggregation in the presence of halothane is mediated by an increase in cAMP production. The action of halothane on  $\text{Ca}^{2+}$  signaling and platelet aggregation appeared to be closely linked to the production of phospholipase C-related second messengers. In contrast, forskolin can directly inhibit the capacitative  $\text{Ca}^{2+}$  influx and platelet aggregation induced by thapsigargin. These results indicate that the increase in cytosolic  $\text{Ca}^{2+}$  is directly responsible for the aggregation in aspirin-treated blood platelets activated by thapsigargin. Halothane cannot, however, impair the platelet aggregation process if the  $\text{Ca}^{2+}$  increase results from a phospholipase C-independent mechanism.

The authors thank Line Garneau and Dr. Lucie Parent for their critical reading of the manuscript.

## References

1. Gibbs NM: The effect of anaesthetic agents on platelet function. *Anesth Intens Care* 1991; 19:495-505
2. Dalsgaard-Nielsen J, Risbo A, Simmelkjaer P, Gormsen J: Impaired platelet aggregation and increased bleeding time during general anaesthesia with halothane. *Br J Anaesth* 1981; 53:1039-42
3. Dalsgaard-Nielsen J, Gormsen J: Effects of halothane on platelet function. *Thromb Haemost* 1980; 44:143-5
4. Hofmann JG, Siedel U, Till U: Effect of halothane on metabolic ATP and induced aggregation of human blood platelets. *Biomed Biochim Acta* 1989; 48:337-41
5. Bertha BG, Folts JD, Nugent M, Rusy BF: Halothane, but not isoflurane or enflurane, protects against spontaneous and epinephrine-exacerbated acute thrombus formation in stenosed dog coronary arteries. *ANESTHESIOLOGY* 1989; 71:96-102
6. Siess W: Molecular mechanisms of platelet activation. *Physiol Rev* 1989; 69:158-78
7. Rink TJ, Sage SO: Calcium signaling in human platelets. *Annu Rev Physiol* 1990; 52:431-49
8. Freeman LC, Li Q: Effects of halothane on delayed after depolarization and calcium transients in dog ventricular myocytes exposed to isoproterenol. *ANESTHESIOLOGY* 1991; 74:146-54
9. Loeb AL, Longnecker DE, Williamson JR: Alteration of  $\text{Ca}^{2+}$  mobilization in endothelial cells by volatile anesthetics. *Biochem Pharmacol* 1993; 45:1137-42
10. Simoneau C, Thuringer D, Cai S, Garneau L, Blaise G, Sauvé R: Effects of halothane and isoflurane on bradykinin-induced  $\text{Ca}^{2+}$  influx in bovine aortic endothelial cells. *ANESTHESIOLOGY* 1996; 85:366-79



11. Kohro S, Yamakage M: Direct inhibitory mechanisms of halothane on human platelet aggregation. *ANESTHESIOLOGY* 1996; 85:96-106
12. Sprague DH, Yang JC, Ngai SH: Effects of isoflurane and halothane on contractility and the cyclic 3',5'-adenosine monophosphate system in the rat aorta. *ANESTHESIOLOGY* 1974; 40:162-7
13. Walter F, Vulliamoz Y, Verosky M, Triner L: Effects of halothane on the cyclic 3',5'-adenosine monophosphate enzyme system in human platelets. *Anesth Analg* 1980; 59:856-61
14. Haynes DH: Effects of cyclic nucleotides and protein kinases on platelet calcium homeostasis and mobilization. *Platelets* 1993; 4:231-42
15. Sage SO, Reast R, Rink TJ: ADP evokes biphasic  $Ca^{2+}$  influx in fura-2 loaded human platelets. Evidence for a  $Ca^{2+}$  entry regulated by intracellular stores. *Biochem J* 1990; 265:675-80
16. Franks NP, Lieb WR: Selective actions of volatile general anaesthetics at molecular and cellular levels. *Br J Anaesth* 1993; 71:65-76
17. Blaise G, To Q, Parent M, Lagarde B, Asenjo F, Sauvé R: Does halothane interfere with the release, action, or stability of endothelium-derived relaxing factor/nitric oxide? *ANESTHESIOLOGY* 1994; 80:417-26
18. Grynkiewicz G, Poenie M, Tsien RY: A new generation of  $Ca^{2+}$  indicators with greatly improved fluorescence properties. *J Biol Chem* 1985; 260:3440-50
19. Putney JW: Capacitative calcium entry revisited. *Cell Calcium* 1990; 11:611-24
20. Thastrup O, Linnebjerg H, Bjerrum PJ, Knudsen JB, Christensen SB: The inflammatory and tumor-promoting sesquiterpene lactone, thapsigargin, activates platelets by selective mobilization of calcium as shown by protein phosphorylations. *Biochim Biophys Acta* 1987; 927:65-73
21. Sill JC, Uhl C, Eskuri S, Van Dyke R, Tarara J: Halothane inhibits agonist-induced inositol phosphate and  $Ca^{2+}$  signaling in A7r5 cultured vascular smooth muscle cells. *Mol Pharmacol* 1991; 40:1006-13
22. Kosk-Kosicka D, Roszczynska G: Inhibition of plasma membrane  $Ca^{2+}$ -ATPase activity by volatile anesthetics. *ANESTHESIOLOGY* 1993; 79:774-80
23. Suganuma A, Nakasima S, Okano Y, Nozawa Y: Mass contents of inositol 1,4,5-triphosphate and 1,2-diacylglycerol in human platelets stimulated with a thromboxane analogue and thrombin. *Thromb Haemost* 1992; 68:341-5
24. Sage SO, Rink TJ: The kinetics of changes in intracellular calcium concentration in fura-2 loaded human platelets. *J Biol Chem* 1987; 262:16364-9
25. Koike Y, Ozaki Y, Qi R, Satoh K, Kurota K, Yatomi Y, Kume S: Phosphatase inhibitors suppress  $Ca^{2+}$  influx induced by receptor-mediated intracellular  $Ca^{2+}$  store depletion in human platelets. *Cell Calcium* 1994; 15:381-90
26. Zucker MB, Troll W, Belman S: The tumor-promotor phorbol ester (12-O-tetradecanoyl-phorbol-13-acetate), a potent aggregating agent for blood platelets. *J Cell Biol* 1974; 60:325-36
27. Rink TJ, Sanchez A, Hallam TJ: Diacylglycerol and phorbol ester stimulate secretion without raising cytoplasmic free calcium in human platelets. *Nature* 1983; 305:317-9
28. Rooney TA, Hager R, Stubbs C, Thomas AP: Halothane regulates G-protein-dependent phospholipase C activity in turkey erythrocyte membranes. *J Biol Chem* 1993; 268:15550-6
